# Supplementary material
Source: PubMed Central journal article supplement (PMC5564417)
Supplement: NIHMS888096-supplement-supplement_1.pdf [file NIHMS888096-supplement-supplement_1.pdf]

**Supplemental Table 1.** Association of walking intercept and slope with year 10 variables.

| Outcome (measured at year 10)                               | Walking Intercept |         | Walking Slope |         |
|-------------------------------------------------------------|-------------------|---------|---------------|---------|
|                                                             | Estimate (SE)     | P value | Estimate (SE) | P value |
| <i>Hippocampus</i>                                          |                   |         |               |         |
| Volume (cm <sup>3</sup> )                                   | -0.001 (0.09)     | .993    | -0.007 (0.09) | .938    |
| Mean diffusivity (10 <sup>-3</sup> mm <sup>2</sup> /s)      | -0.02 (0.02)      | .306    | 0.01 (0.02)   | .534    |
| <i>Global brain measures</i>                                |                   |         |               |         |
| GM volume (cm <sup>3</sup> )                                | -0.68 (3.52)      | .846    | -2.37 (3.53)  | .502    |
| GM mean diffusivity (10 <sup>-3</sup> mm <sup>2</sup> /s)   | -.0002 (.005)     | .954    | 0.001 (0.005) | .750    |
| WM fractional anisotropy                                    | -0.01 (0.01)      | .215    | 0.004 (0.01)  | .694    |
| WM radial diffusivity (10 <sup>-3</sup> mm <sup>2</sup> /s) | 0.002 (0.003)     | .571    | 0.001 (0.003) | .734    |
| WM axial diffusivity (10 <sup>-3</sup> mm <sup>2</sup> /s)  | -0.002 (0.003)    | .525    | 0.002 (0.003) | .506    |
| WM hyperintensities <sup>1</sup>                            | 0.06 (0.47)       | .900    | -0.47 (0.47)  | .322    |
| <i>Cognition</i>                                            |                   |         |               |         |
| Modified Mini-Mental State Examination                      | 0.01 (0.44)       | .979    | -0.09 (0.44)  | .830    |

*Notes.* Adjusted for intracranial volume (volume and mean diffusivity measures only), age, gender, race, education, and APOE ε4 carrier status.

<sup>1</sup>Log-transformed.

GM = gray matter. WM = white matter.

**Supplemental Table 2.** Comparison of the study sample to the parent HABC sample and to participants with baseline MRI only.

|                                                      | Study sample<br>(n = 141) | Remaining HABC<br>sample (n = 2934) | P value <sup>1</sup> |
|------------------------------------------------------|---------------------------|-------------------------------------|----------------------|
| Baseline age, <i>M</i> (SD)                          | 72.4 (2.4)                | 73.7 (2.9)                          | <.001                |
| Sex, female, n (%)                                   | 84 (60%)                  | 1422 (52%)                          | .08                  |
| Race, black, n (%)                                   | 59 (42%)                  | 1080 (39%)                          | .60                  |
| Education, > high school, n (%)                      | 72 (51%)                  | 1184 (43%)                          | .06                  |
| Body mass index, <i>M</i> (SD)                       | 27.5 (4.4)                | 27.4 (4.9)                          | .74                  |
| Cerebrovascular disease, n (%)                       | 7 (5%)                    | 203 (7%)                            | .36                  |
| Diabetes, n (%)                                      | 12 (9%)                   | 415 (15%)                           | .04                  |
| Modified mini-mental examination,<br><i>M</i> (SD)   | 92.5 (6.4)                | 90.3 (7.5)                          | <.001                |
| Gait speed, <i>M</i> (SD)                            | 1.3 (0.2)                 | 1.2 (0.2)                           | <.001                |
| Current or former smoker, n (%)                      | 69 (49%)                  | 1559 (57%)                          |                      |
| Alcohol consumption, once or more<br>per week, n (%) | 54 (38%)                  | 802 (29%)                           | .02                  |
| Walking intercept, <i>M</i> (SD)                     | 3.3 (1.6)                 | 2.8 (1.6)                           | <.001                |
| Walking slope, <i>M</i> (SD)                         | -0.09 (0.11)              | -0.12 (0.11)                        | .05                  |
| Alive at year 10                                     | 141 (100%)                | 2195 (75%)                          | n/a                  |

  

|                                                      | Study sample<br>(n = 141) | Remaining MRI<br>sample (n = 172) | P value <sup>1</sup> |
|------------------------------------------------------|---------------------------|-----------------------------------|----------------------|
| Baseline age, <i>M</i> (SD)                          | 72.4 (2.4)                | 73.4 (2.9)                        | .002                 |
| Sex, female, n (%)                                   | 84 (60%)                  | 95 (56%)                          | .63                  |
| Race, black, n (%)                                   | 59 (42%)                  | 65 (38%)                          | .62                  |
| Education, > high school, n (%)                      | 72 (51%)                  | 87 (52%)                          | .90                  |
| Body mass index, <i>M</i> (SD)                       | 27.5 (4.4)                | 27.2 (4.7)                        | .51                  |
| Cerebrovascular disease, n (%)                       | 7 (5%)                    | 5 (3%)                            | .54                  |
| Diabetes, n (%)                                      | 12 (9%)                   | 23 (14%)                          | .22                  |
| Modified mini-mental examination,<br><i>M</i> (SD)   | 92.5 (6.4)                | 91.9 (6.3)                        | .41                  |
| Gait speed, <i>M</i> (SD)                            | 1.3 (0.2)                 | 1.3 (0.3)                         | .58                  |
| Current or former smoker, n (%)                      | 69 (49%)                  | 79 (47%)                          | .15                  |
| Alcohol consumption, once or more<br>per week, n (%) | 54 (38%)                  | 47 (28%)                          | .05                  |
| Walking intercept, <i>M</i> (SD)                     | 3.3 (1.6)                 | 3.3 (1.5)                         | .99                  |
| Walking slope, <i>M</i> (SD)                         | -0.09 (0.11)              | -0.12 (0.11)                      | .15                  |
| Alive at year 13, n (%)                              | 141 (100%)                | 134 (78%)                         | n/a                  |

<sup>1</sup>Determined from Welch two sample t-test for continuous measures or chi squared tests for categorical measures.

**Supplemental Table 3.** Descriptive statistics for self-reported time spent walking at each time point.

| Time point | Mean (SD)     | Median<br>(25 <sup>th</sup> , 75 <sup>th</sup> percentiles) | Median assessment date<br>(and range)                   |
|------------|---------------|-------------------------------------------------------------|---------------------------------------------------------|
| Year 1     | 188.6 (447.0) | 45 (0, 181.25)                                              | December 11, 1997<br>(April 28, 1997 – June 22, 1998)   |
| Year 2     | 161.3 (241.9) | 90 (0, 210.0)                                               | January 21, 1999<br>(February 24, 1998 – June 17, 1999) |
| Year 3     | 128.3 (208.4) | 60 (0, 175)                                                 | January 19, 2000<br>(July 6, 1999 – September 25, 2000) |
| Year 4     | 135.9 (382.4) | 60 (0, 142.5)                                               | January 2, 2001<br>(July 5, 2000 – December 8, 2001)    |
| Year 5     | 116.7 (179.0) | 60 (0, 140.0)                                               | December 14, 2001<br>(June 20, 2001 – June 20, 2002)    |
| Year 6     | 78.7 (127.1)  | 30 (0, 120.0)                                               | November 21, 2002<br>(June 5, 2002 – May 20, 2003)      |
| Year 7     | 103.7 (281.2) | 30 (0, 116.0)                                               | November 12, 2003<br>(May 1, 2003 – June 4, 2004)       |
| Year 8     | 97.0 (184.8)  | 30 (0, 140.0)                                               | January 20, 2005<br>(July 30, 2004 – May 31, 2005)      |
| Year 9     | 117.8 (207.4) | 40 (0, 120.0)                                               | December 13, 2005<br>(July 11, 2005 – May 2, 2006)      |
| Year 10    | 86.1 (121.2)  | 45 (0, 105.0)                                               | November 21, 2006<br>(June 7, 2006 – June 5, 2007)      |

**Supplement Table 4.** Correlation of Walking Intercept and Slope Scores with Sample Characteristics.

|                                                | Walking Intercept | Walking Slope |
|------------------------------------------------|-------------------|---------------|
| <b>Demographics</b>                            |                   |               |
| Age                                            | .17*              | -.11          |
| Sex, female                                    | .03               | -.05          |
| Race, black                                    | -.12              | -.04          |
| Education                                      | .13               | -.07          |
| Body mass index                                | -.07              | .04           |
| <b>Chronic disease conditions at first MRI</b> |                   |               |
| Cardiovascular disease                         | .01               | -.10          |
| Stroke                                         | .05               | -.13          |
| Diabetes                                       | -.05              | -.03          |
| APOE ε4 carrier                                | -.19**            | .11           |
| Gait speed at first MRI                        | .05               | .21*          |
| <b>Health behavior at first MRI</b>            |                   |               |
| Current or former smoker                       | .01               | .05           |
| Current or former alcohol drinker              | .03               | .11           |
| Systolic blood pressure at first MRI           | -.12              | -.005         |
| Use of medications for hypertension            | -.05              | -.06          |

*Notes.* For continuous variables, Pearson correlations were calculated; for categorical variables, Kendall correlations were calculated. \* $p < .05$ ; \*\* $p < .01$

**Supplemental Table 5.** Summary of primary analyses with individuals with chronic stroke excluded

| Outcome                                                        | Adjusted for demographic factors and genetic risk for cognitive decline <sup>1</sup> |         |                  |         | Further adjusted for physical health at year 10 <sup>2</sup> |         |                  |         |
|----------------------------------------------------------------|--------------------------------------------------------------------------------------|---------|------------------|---------|--------------------------------------------------------------|---------|------------------|---------|
|                                                                | Walking Intercept                                                                    |         | Walking Slope    |         | Walking Intercept                                            |         | Walking Slope    |         |
|                                                                | Estimate<br>(SE)                                                                     | P value | Estimate<br>(SE) | P value | Estimate<br>(SE)                                             | P value | Estimate<br>(SE) | P value |
| <i>Hippocampus</i>                                             |                                                                                      |         |                  |         |                                                              |         |                  |         |
| Volume (cm <sup>3</sup> )                                      | 0.09 (0.08)                                                                          | .256    | 0.19 (0.08)      | .016    | 0.03 (0.09)                                                  | .745    | 0.21 (0.09)      | .017    |
| Mean diffusivity<br>(10 <sup>-3</sup> mm <sup>2</sup> /s)      | .008 (.009)                                                                          | .357    | -.005 (.009)     | .570    | .007 (.009)                                                  | .414    | -.005<br>(.009)  | .524    |
| <i>Global brain measures</i>                                   |                                                                                      |         |                  |         |                                                              |         |                  |         |
| GM volume (cm <sup>3</sup> )                                   | 0.18 (2.24)                                                                          | .934    | 4.85 (2.19)      | .027    | 0.57 (2.39)                                                  | .810    | 6.49 (2.32)      | .005    |
| GM mean diffusivity<br>(10 <sup>-3</sup> mm <sup>2</sup> /s)   | .001 (.003)                                                                          | .632    | -.008 (0.003)    | .006    | .002 (.003)                                                  | .425    | -.005<br>(.003)  | .090    |
| WM fractional<br>anisotropy                                    | .006 (.006)                                                                          | .385    | .005 (.006)      | .463    | .003 (.006)                                                  | .655    | .004 (.006)      | .535    |
| WM radial diffusivity<br>(10 <sup>-3</sup> mm <sup>2</sup> /s) | .0002 (.002)                                                                         | .869    | -.004 (.002)     | .009    | .0004 (.002)                                                 | .833    | -.004<br>(.002)  | .038    |
| WM axial diffusivity<br>(10 <sup>-3</sup> mm <sup>2</sup> /s)  | .003 (.002)                                                                          | .224    | -.007 (.002)     | <.001   | .003 (.002)                                                  | .265    | -.006<br>(.002)  | .006    |
| WM hyperintensities <sup>3</sup>                               | 0.37 (0.30)                                                                          | .209    | 0.20 (0.29)      | .504    | 0.28 (0.31)                                                  | .368    | 0.36 (0.30)      | .237    |
| <i>Cognition</i>                                               |                                                                                      |         |                  |         |                                                              |         |                  |         |

|                                          |             |      |             |      |             |      |             |      |
|------------------------------------------|-------------|------|-------------|------|-------------|------|-------------|------|
| Δ Modified Mini-Mental State Examination | 0.30 (0.39) | .439 | 1.05 (0.37) | .004 | 0.35 (0.44) | .432 | 1.07 (0.41) | .009 |
|------------------------------------------|-------------|------|-------------|------|-------------|------|-------------|------|

---

<sup>1</sup>Adjusted for intracranial volume (volumetric and mean diffusivity measures only), age, gender, race, education, and APOE ε4 carrier status.

<sup>2</sup>Further adjusted for body mass index, gait speed, chronic disease conditions (diabetes, stroke, cardiovascular disease), health behaviours (smoking and drinking status), systolic blood pressure, and use of hypertensive medications.

GM = gray matter. WM = white matter.

<sup>3</sup>Log-transformed

**Supplemental Table 6.** Association of year 10 walking score (log-transformed) with structural MRI variables

| <b>Outcome</b>                                                   | <b>Estimate (SE)</b> | <b>P value</b> |
|------------------------------------------------------------------|----------------------|----------------|
| <i>Hippocampus</i>                                               |                      |                |
| Δ Volume (cm <sup>3</sup> )                                      | 0.11 (0.07)          | .142           |
| Δ Mean diffusivity (10 <sup>-3</sup> mm <sup>2</sup> /s)         | .003 (.008)          | .694           |
| <i>Global brain measures</i>                                     |                      |                |
| Δ GM volume (cm <sup>3</sup> )                                   | 0.39 (2.08)          | .850           |
| Δ GM mean diffusivity (10 <sup>-3</sup> mm <sup>2</sup> /s)      | -.004 (.003)         | .132           |
| Δ WM fractional anisotropy                                       | .013 (.006)          | .018           |
| Δ WM radial diffusivity<br>(10 <sup>-3</sup> mm <sup>2</sup> /s) | -0.003 (.002)        | .071           |
| Δ WM axial diffusivity (10 <sup>-3</sup> mm <sup>2</sup> /s)     | -0.001 (0.002)       | .765           |
| Δ WM hyperintensities                                            | 0.56 (0.30)          | .065           |
| <i>Cognition</i>                                                 |                      |                |
| Δ Modified Mini-Mental State Examination                         | 0.34 (0.34)          | .318           |

*Notes.* Adjusted for intracranial volume (volumetric and mean diffusivity measures only), age, gender, race, education, and APOE ε4 carrier status.

GM = gray matter. WM = white matter.

**Supplemental Table 7.** Association of walking slope from year 6 to year 10 with changes in outcome variables between year 10 and year 13.

| Outcome (measured at year 10)                                 | Walking Slope  |         |
|---------------------------------------------------------------|----------------|---------|
|                                                               | Estimate (SE)  | P value |
| <i>Hippocampus</i>                                            |                |         |
| Δ Volume (cm <sup>3</sup> )                                   | 0.07 (0.10)    | .518    |
| Δ Mean diffusivity (10 <sup>-3</sup> mm <sup>2</sup> /s)      | 0.004 (0.01)   | .750    |
| <i>Global brain measures</i>                                  |                |         |
| Δ GM volume (cm <sup>3</sup> )                                | 3.03 (2.94)    | .303    |
| Δ GM mean diffusivity (10 <sup>-3</sup> mm <sup>2</sup> /s)   | -0.008 (0.004) | .031    |
| Δ WM fractional anisotropy                                    | 0.02 (0.01)    | .028    |
| Δ WM radial diffusivity (10 <sup>-3</sup> mm <sup>2</sup> /s) | -0.003 (0.002) | .146    |
| Δ WM axial diffusivity (10 <sup>-3</sup> mm <sup>2</sup> /s)  | -0.003 (0.003) | .327    |
| Δ WM hyperintensities <sup>1</sup>                            | -0.43 (0.44)   | .328    |
| <i>Cognition</i>                                              |                |         |
| Δ Modified Mini-Mental State Examination                      | 0.17 (0.50)    | .729    |

*Notes.* Adjusted for intracranial volume (volume and mean diffusivity measures only), age, gender, race, education, APOE ε4 carrier status, and walking intercept.

<sup>1</sup>Log-transformed.

GM = gray matter. WM = white matter.



**Supplemental Table 8.** Association of 400-meter walk performance with changes in outcome variables between year 10 and year 13.

| Outcome                                                          | Predictor           |         |                 |         |
|------------------------------------------------------------------|---------------------|---------|-----------------|---------|
|                                                                  | 400 Meter Intercept |         | 400 Meter Slope |         |
|                                                                  | Estimate (SE)       | P value | Estimate (SE)   | P value |
| <i>Hippocampus</i>                                               |                     |         |                 |         |
| Δ Volume (cm <sup>3</sup> )                                      | -0.06 (0.09)        | .472    | -0.10 (0.08)    | .230    |
| Δ Mean diffusivity<br>(10 <sup>-3</sup> mm <sup>2</sup> /s)      | -0.02 (0.01)        | .084    | -0.01 (0.01)    | .110    |
| <i>Global brain measures</i>                                     |                     |         |                 |         |
| Δ GM volume (cm <sup>3</sup> )                                   | -2.23 (2.39)        | .350    | -2.21 (2.31)    | .339    |
| Δ GM mean diffusivity                                            | -0.002 (0.003)      | .546    | 0.001 (0.003)   | .691    |
| Δ WM fractional anisotropy                                       | 0.005 (0.006)       | .429    | -0.010 (0.006)  | .102    |
| Δ WM radial diffusivity<br>(10 <sup>-3</sup> mm <sup>2</sup> /s) | -0.002 (0.002)      | .301    | 0.002 (0.002)   | .240    |
| Δ WM axial diffusivity<br>(10 <sup>-3</sup> mm <sup>2</sup> /s)  | -0.002 (0.002)      | .273    | 0.003 (0.002)   | .224    |
| Δ WM hyperintensities                                            | -0.28 (0.35)        | .428    | -0.17 (0.34)    | .613    |
| <i>Cognition</i>                                                 |                     |         |                 |         |
| Δ Modified Mini-Mental<br>State Examination                      | 0.01 (0.41)         | .978    | -0.03 (0.37)    | .937    |

*Notes:* Time to walk 400 meters was assessed at years 1, 2, 4, 6, 8, and 10. Higher scores indicate poorer physical performance. Thus, a positive slope would indicate a worsening in performance over 10 years. The correlation between the time spent walking slope and the 400-meter walk slope was modest ( $r = -.13$ ).

Estimates are adjusted for intracranial volume (volumetric and mean diffusivity measures only), age, gender, race, education, and APOE ε4 carrier status.

GM = gray matter. WM = white matter.
